# Supplementary material
Source: PubMed Central journal article supplement (PMC2084293)

snapshot 0

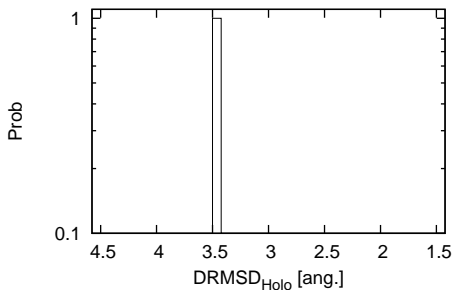snapshot  $\tau$ 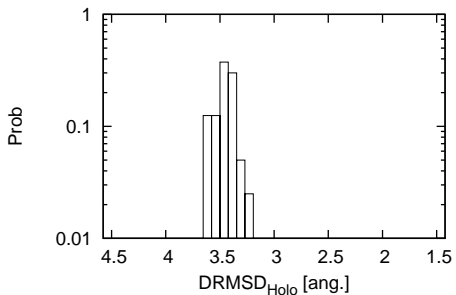snapshot  $4 \tau$ 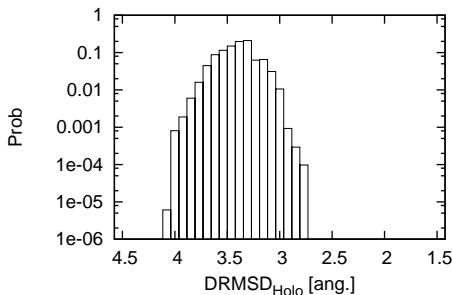snapshot  $8 \tau$ 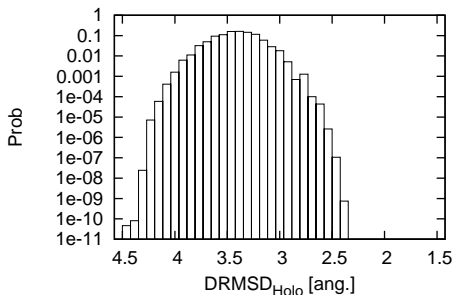snapshot  $16 \tau$ 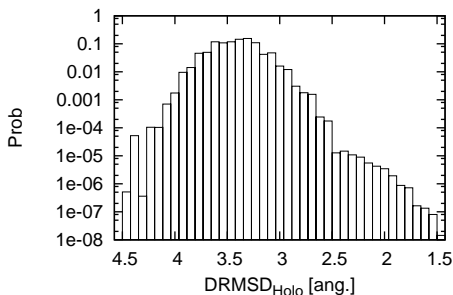snapshot  $100 \tau$ 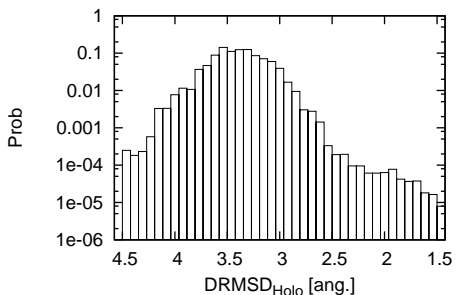

Supplement: pnas_0706349104_1.pdf [file pnas_0706349104_1.pdf]

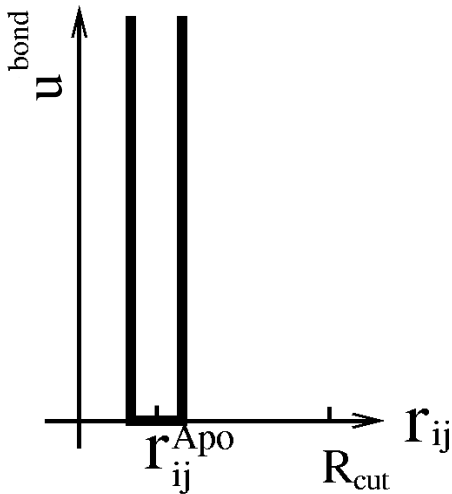

Supplement: pnas_0706349104_2.pdf [file pnas_0706349104_2.pdf]

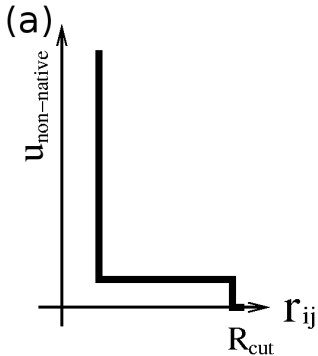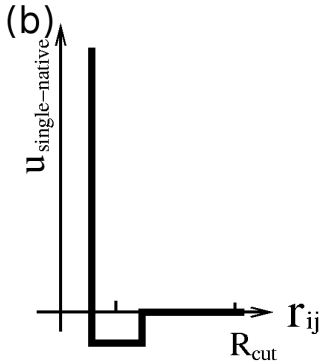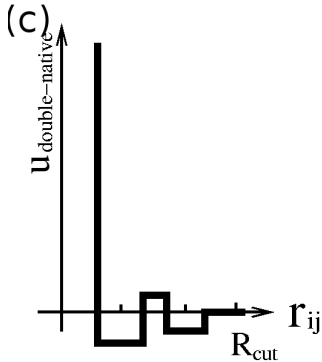

Supplement: pnas_0706349104_3.pdf [file pnas_0706349104_3.pdf]
